# Supplementary material for: Biodegradable thermoreversible gelling PLGA-g-PEG copolymers
Source: Royal Society of Chemistry journal article supplement (doi:10.1039/b102819g), 2001-01-01
Supplement: b102819g.doc [file b102819g.doc]

Supporting material 1. 1H-NMR of PLGA-g-PEG in CDCl3


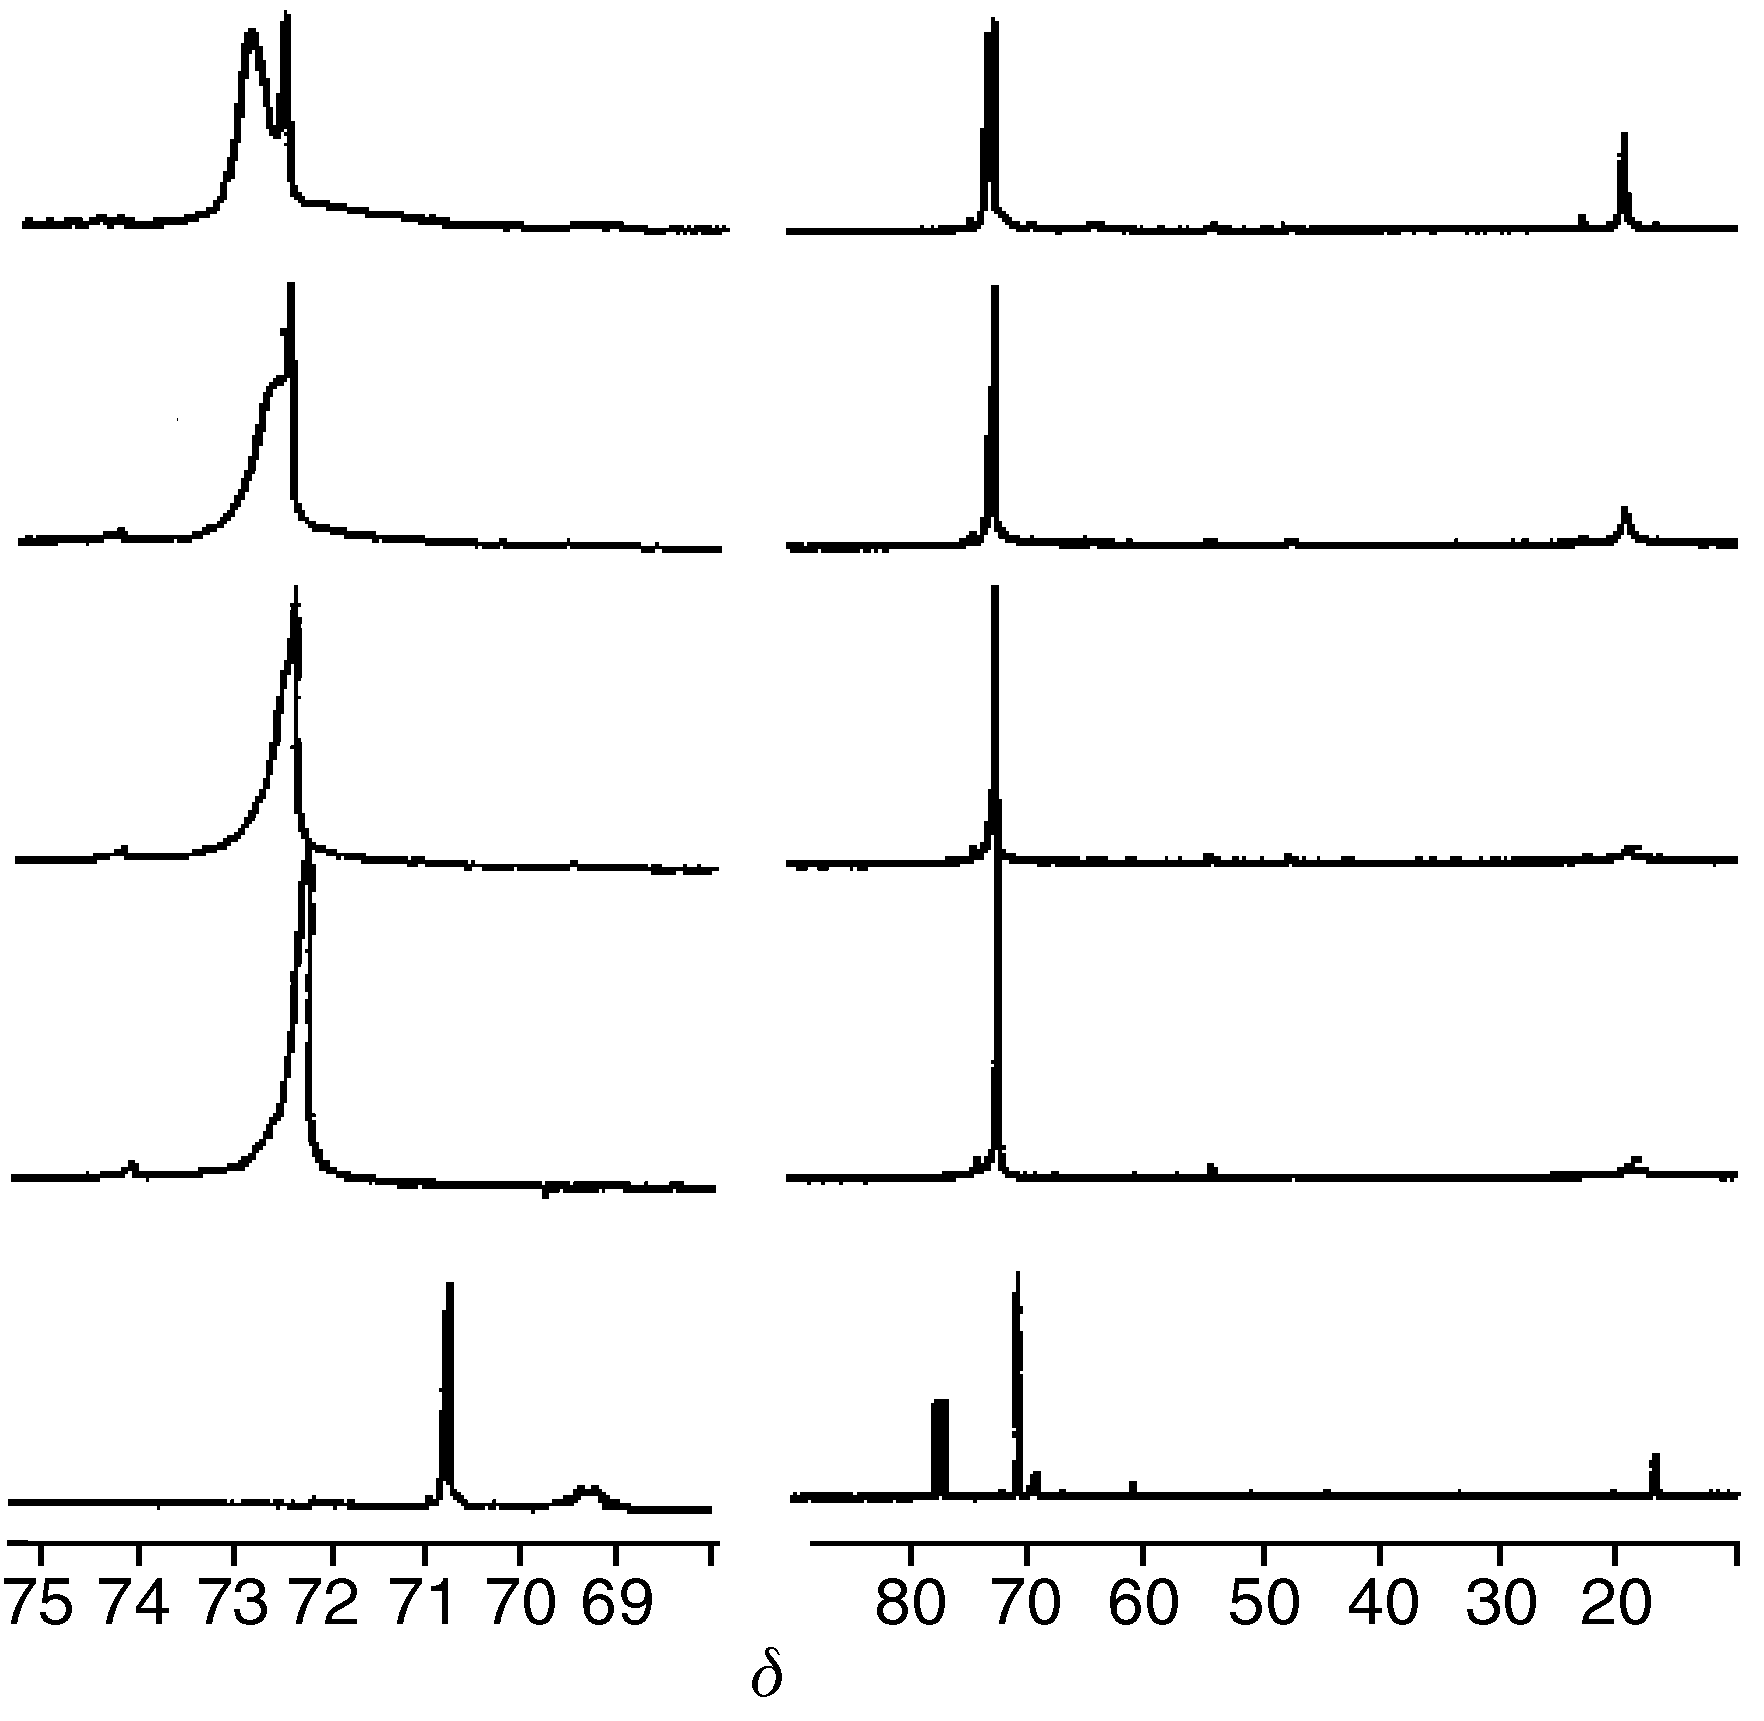


13C-NMR (75 MHz) spectra of 25 wt% PLGA-g-PEG copolymer in D2O as a function of temperature. The zoomed spectra around  73 are shown to the left. The sample was equilibrated for 15 minutes at each temperature before measurement. 20 oC (sol phase), 33 oC (just above sol-to-gel transition), 40 oC (gel phase), and 50 oC (syneresis) are the various measured temperatures. 13C-NMR spectrum in CDCl3 at room temperature is also shown as a reference.
